# Supplementary material
Source: PubMed Central journal article supplement (PMC2576731)
Supplement: supp_82_suppl-3_iii26__1.pdf [file supp_82_suppl-3_iii26__1.pdf]

Table A Proportion of men reporting commercial sex in the last 12 months†

| Region         | Age group | Numerator | Denominator | 15–24: 25–49<br>year old ratio | Year | Source | Prevalence               |
|----------------|-----------|-----------|-------------|--------------------------------|------|--------|--------------------------|
|                |           |           |             |                                |      |        | (%) of clients<br>of FSW |
| W Africa       |           |           |             |                                |      |        |                          |
| Benin 1996 DHS | 15–19     |           | 295         | .                              | 1996 | DHS    |                          |
|                | 20–24     | 77        | 247         |                                |      |        | 26.1                     |
|                | 15–24     | 77        | 542         |                                |      |        | 26.1                     |
|                | 25–49     | 169       | 977         |                                |      |        | 17.3                     |
|                | 15–49     | 246       | 1272        |                                |      |        | 19.3                     |
| Benin 2001 DHS | 15–19     | 1         | 496         | 0.8                            | 2001 | DHS    | 0.2                      |
|                | 20–24     | 2         | 409         |                                |      |        | 0.5                      |
|                | 15–24     | 3         | 905         |                                |      |        | 0.4                      |

| Region            | Age group | Numerator | Denominator | 15–24: 25–49   |  | Year | Source | Prevalence            |
|-------------------|-----------|-----------|-------------|----------------|--|------|--------|-----------------------|
|                   |           |           |             | year old ratio |  |      |        | (%) of clients of FSW |
|                   | 25–49     | 8         | 1559        |                |  |      |        | 0.5                   |
|                   | 15–49     | 12        | 2465        |                |  |      |        | 0.5                   |
| Burkina Faso 1999 | 15–19     | 46        | 599         | 1.5            |  | 1999 | DHS    | 7.7                   |
|                   |           |           |             |                |  |      |        | DHS                   |
|                   | 20–24     | 67        | 395         |                |  |      |        | 17                    |
|                   | 15–24     | 113       | 994         |                |  |      |        | 11.4                  |
|                   | 25–49     | 102       | 1360        |                |  |      |        | 7.5                   |
|                   | 15–49     | 215       | 2354        |                |  |      |        | 9.1                   |
| Burkina Faso 2003 | 15–19     | 4         | 877         | .              |  | 2003 | DHS    | 0.5                   |
|                   |           |           |             |                |  |      |        | DHS                   |
|                   | 20–24     | 1         | 563         |                |  |      |        | 0.1                   |
|                   | 15–24     | 5         | 1440        |                |  |      |        | 0.3                   |

| Region             | Age group | Numerator | Denominator | 15–24: 25–49   |  | Year | Source | Prevalence            |
|--------------------|-----------|-----------|-------------|----------------|--|------|--------|-----------------------|
|                    |           |           |             | year old ratio |  |      |        | (%) of clients of FSW |
|                    | 25–49     | 1         | 1769        |                |  |      |        | 0                     |
|                    | 15–49     | 5         | 3209        |                |  |      |        | 0.2                   |
| Côte d'Ivoire 1998 | 15–19     | 4         | 180         | 0.4            |  | 1998 | DHS    | 2.1                   |
|                    |           |           |             |                |  |      |        | DHS                   |
|                    | 20–24     | 5         | 158         |                |  |      |        | 3.1                   |
|                    | 15–24     | 9         | 338         |                |  |      |        | 2.6                   |
|                    | 25–49     | 31        | 461         |                |  |      |        | 6.7                   |
|                    | 15–49     | 40        | 799         |                |  |      |        | 5                     |
| Ghana 2003 DHS     | 15–19     | 7         | 1107        | 0.6            |  | 2003 | DHS    | 0.6                   |
|                    | 20–24     | 13        | 684         |                |  |      |        | 2                     |
|                    | 15–24     | 20        | 1791        |                |  |      |        | 1.1                   |
|                    | 25–49     | 52        | 2738        |                |  |      |        | 1.9                   |

| Region             | Age group | Numerator | Denominator | 15–24: 25–49   |  | Year | Source | Prevalence            |
|--------------------|-----------|-----------|-------------|----------------|--|------|--------|-----------------------|
|                    |           |           |             | year old ratio |  |      |        | (%) of clients of FSW |
|                    | 15–49     | 72        | 4529        |                |  |      |        | 1.6                   |
| Guinea 1999 DHS    | 15–19     | 22        | 392         | 1.2            |  | 1999 | DHS    | 5.7                   |
|                    | 20–24     | 14        | 298         |                |  |      |        | 4.7                   |
|                    | 15–24     | 36        | 690         |                |  |      |        | 5.2                   |
|                    | 25–49     | 46        | 1063        |                |  |      |        | 4.3                   |
|                    | 15–49     | 82        | 1752        |                |  |      |        | 4.7                   |
| Guinea-Bissau 1990 | 1         | 13        | 116         | 2.22           |  | 1990 | GPA    | 11.2                  |
|                    | 3         | 18        | 120         |                |  |      |        | 15                    |
|                    | 4         | 31        | 236         |                |  |      |        | 13.1                  |
|                    | 6         | 27        | 454         |                |  |      |        | 5.9                   |
|                    | 7         | 59        | 690         |                |  |      |        | 8.6                   |

| Region         | Age group | Numerator | Denominator | 15–24: 25–49   |  | Year | Source | Prevalence            |
|----------------|-----------|-----------|-------------|----------------|--|------|--------|-----------------------|
|                |           |           |             | year old ratio |  |      |        | (%) of clients of FSW |
| Mali 1996 DHS  | 15–19     | 32        | 441         | 1.5            |  | 1996 | DHS    | 7.5                   |
|                | 20–24     | 50        | 286         |                |  |      |        | 17.9                  |
|                | 15–24     | 82        | 727         |                |  |      |        | 11.6                  |
|                | 25–49     | 108       | 1437        |                |  |      |        | 7.5                   |
|                | 15–49     | 190       | 2163        |                |  |      |        | 8.9                   |
| Mali 2001 DHS  | 15–19     | 1         | 668         | 1              |  | 2001 | DHS    | 0.1                   |
|                | 20–24     | 2         | 463         |                |  |      |        | 0.4                   |
|                | 15–24     | 3         | 1131        |                |  |      |        | 0.2                   |
|                | 25–49     | 4         | 1870        |                |  |      |        | 0.2                   |
|                | 15–49     | 6         | 3000        |                |  |      |        | 0.2                   |
| Niger 1998 DHS | 15–19     | 92        | 759         | 1.6            |  | 1998 | DHS    | 12.1                  |
|                | 20–24     | 67        | 501         |                |  |      |        | 13.5                  |

| Region           | Age group | Numerator | Denominator | 15–24: 25–49   |  | Year | Source | Prevalence            |
|------------------|-----------|-----------|-------------|----------------|--|------|--------|-----------------------|
|                  |           |           |             | year old ratio |  |      |        | (%) of clients of FSW |
|                  | 15–24     | 159       | 1260        |                |  |      |        | 12.6                  |
|                  | 25–49     | 147       | 1883        |                |  |      |        | 7.8                   |
|                  | 15–49     | 306       | 3143        |                |  |      |        | 9.7                   |
| Nigeria 1999 DHS | 1         | 37        | 511         | 0.829999       |  | 1999 | DHS    | 7.2                   |
|                  | 3         | 34        | 319         |                |  |      |        | 10.7                  |
|                  | 4         | 71        | 830         |                |  |      |        | 8.6                   |
|                  | 6         | 148       | 1423        |                |  |      |        | 10.4                  |
|                  | 7         | 219       | 2253        |                |  |      |        | 9.7                   |
| Nigeria 2003 DHS | 15–19     | 8         | 453         | 0.9            |  | 2003 | DHS    | 1.8                   |
|                  | 20–24     | 17        | 426         |                |  |      |        | 4                     |
|                  | 15–24     | 25        | 879         |                |  |      |        | 2.8                   |
|                  | 25–49     | 37        | 1214        |                |  |      |        | 3                     |

| Region         | Age group | Numerator | Denominator | 15–24: 25–49   |  | Year | Source | Prevalence            |
|----------------|-----------|-----------|-------------|----------------|--|------|--------|-----------------------|
|                |           |           |             | year old ratio |  |      |        | (%) of clients of FSW |
|                | 15–49     | 62        | 2093        |                |  |      |        | 3                     |
| Togo 1998 DHS  | 15–19     | 43        | 853         | 1.2            |  | 1998 | DHS    | 5.1                   |
|                | 20–24     | 49        | 607         |                |  |      |        | 8.1                   |
|                | 15–24     | 92        | 1460        |                |  |      |        | 6.3                   |
|                | 25–49     | 108       | 2077        |                |  |      |        | 5.2                   |
|                | 15–49     | 200       | 3537        |                |  |      |        | 5.7                   |
| Central Africa |           |           |             |                |  |      |        |                       |
| CAR 1989 GPA   | 1         | 39        | 244         | 1.48           |  | 1989 | GPA    | 16                    |
|                | 3         | 42        | 267         |                |  |      |        | 15.7                  |
|                | 4         | 81        | 511         |                |  |      |        | 15.9                  |
|                | 6         | 79        | 741         |                |  |      |        | 10.7                  |
|                | 7         | 160       | 1252        |                |  |      |        | 12.8                  |

| Region            | Age group | Numerator | Denominator | 15–24: 25–49   |                       | Year | Source | Prevalence |
|-------------------|-----------|-----------|-------------|----------------|-----------------------|------|--------|------------|
|                   |           |           |             | year old ratio | (%) of clients of FSW |      |        |            |
| CAR 1994 DHS      | 15–19     | 29        | 320         | 1.6            |                       | 1994 | DHS    | 9.2        |
|                   | 20–24     | 55        | 276         |                |                       |      |        | 20         |
|                   | 15–24     | 84        | 596         |                |                       |      |        | 14.2       |
|                   | 25–49     | 84        | 944         |                |                       |      |        | 8.9        |
|                   | 15–49     | 168       | 1541        |                |                       |      |        | 10.9       |
| Cameroon 1998 DHS | 15–19     | 54        | 539         | 0.8            |                       | 1998 | DHS    | 10.1       |
|                   | 20–24     | 146       | 528         |                |                       |      |        | 27.6       |
|                   | 15–24     | 200       | 1067        |                |                       |      |        | 18.8       |
|                   | 25–49     | 292       | 1278        |                |                       |      |        | 22.8       |
|                   | 15–49     | 492       | 2345        |                |                       |      |        | 21         |
| Cameroon 2004     | 15–19     | 7         | 1224        | 1.1            |                       | 2004 | DHS    | 0.6        |



| Region        | Age group | Numerator | Denominator | 15–24: 25–49   |  | Year | Source | Prevalence            |
|---------------|-----------|-----------|-------------|----------------|--|------|--------|-----------------------|
|               |           |           |             | year old ratio |  |      |        | (%) of clients of FSW |
| DHS           |           |           |             |                |  |      |        |                       |
|               | 20–24     | 11        | 953         |                |  |      |        | 1.1                   |
|               | 15–24     | 18        | 2177        |                |  |      |        | 0.8                   |
|               | 25–49     | 18        | 2638        |                |  |      |        | 0.7                   |
|               | 15–49     | 36        | 4815        |                |  |      |        | 0.7                   |
| Chad 1997 DHS | 15–19     | 80        | 490         | 1.8            |  | 1997 | DHS    | 16.2                  |
|               | 20–24     | 80        | 373         |                |  |      |        | 21.3                  |
|               | 15–24     | 160       | 863         |                |  |      |        | 18.4                  |
|               | 25–49     | 131       | 1277        |                |  |      |        | 10.3                  |
|               | 15–49     | 291       | 2140        |                |  |      |        | 13.6                  |
| Chad 2004 DHS | 15–19     | 8         | 406         | 3.5            |  | 2004 | DHS    | 2                     |
|               | 20–24     | 11        | 267         |                |  |      |        | 4.1                   |

| Region         | Age group | Numerator | Denominator | 15–24: 25–49   |  | Year | Source | Prevalence            |
|----------------|-----------|-----------|-------------|----------------|--|------|--------|-----------------------|
|                |           |           |             | year old ratio |  |      |        | (%) of clients of FSW |
| Congo 1999 PSI | 15–24     | 19        | 673         |                |  |      |        | 2.8                   |
|                | 25–49     | 8         | 1009        |                |  |      |        | 0.8                   |
|                | 15–49     | 27        | 1682        |                |  |      |        | 1.6                   |
|                | 1         | 15        | 130         | 1.13           |  | 1999 | PSI    | 11.5                  |
|                | 3         | 37        | 196         |                |  |      |        | 18.9                  |
|                | 4         | 52        | 326         |                |  |      |        | 16                    |
|                | 6         | 83        | 585         |                |  |      |        | 14.2                  |
| Gabon 2000 DHS | 7         | 135       | 911         |                |  |      |        | 14.8                  |
|                | 15–19     | 27        | 381         | 0.8            |  | 2000 | DHS    | 7                     |
|                | 20–24     | 35        | 337         |                |  |      |        | 10.3                  |
|                | 15–24     | 62        | 718         |                |  |      |        | 8.5                   |
|                | 25–49     | 117       | 1111        |                |  |      |        | 10.6                  |

| Region            | Age group | Numerator | Denominator | 15–24: 25–49   |                       | Year | Source | Prevalence |
|-------------------|-----------|-----------|-------------|----------------|-----------------------|------|--------|------------|
|                   |           |           |             | year old ratio | (%) of clients of FSW |      |        |            |
|                   | 15–49     | 178       | 1829        |                |                       |      |        | 9.8        |
| E Africa          |           |           |             |                |                       |      |        |            |
| Eritrea 1995 DHS  | 1         | 0         | 237         | 1.23           | 1995                  | DHS  | 0      |            |
|                   | 3         | 14        | 142         |                |                       |      |        | 9.9        |
|                   | 6         | 18        | 585         |                |                       |      |        | 3.1        |
|                   | 7         | 29        | 964         |                |                       |      |        | 3          |
| Ethiopia 2000 DHS | 15–19     | 0         | 600         | .              | 2000                  | DHS  | 0      |            |
|                   | 20–24     | 0         | 408         |                |                       |      | 0      |            |
|                   | 15–24     | 0         | 1008        |                |                       |      | 0      |            |
|                   | 25–49     | 0         | 1312        |                |                       |      | 0      |            |
|                   | 15–49     | 0         | 2320        |                |                       |      | 0      |            |
| Kenya 1990 GPA    | 1         | 20        | 217         | 1.35           | 1990                  | GPA  | 9.2    |            |

| Region         | Age group | Numerator | Denominator | 15–24: 25–49   |  | Year | Source | Prevalence            |
|----------------|-----------|-----------|-------------|----------------|--|------|--------|-----------------------|
|                |           |           |             | year old ratio |  |      |        | (%) of clients of FSW |
|                | 3         | 30        | 202         |                |  |      |        | 14.9                  |
|                | 4         | 50        | 419         |                |  |      |        | 11.9                  |
|                | 6         | 77        | 871         |                |  |      |        | 8.8                   |
|                | 7         | 127       | 1290        |                |  |      |        | 9.8                   |
| Kenya 1998 DHS | 15–19     | 74        | 811         | 1.1            |  | 1998 | DHS    | 9.1                   |
|                | 20–24     | 96        | 589         |                |  |      |        | 16.4                  |
|                | 15–24     | 170       | 1400        |                |  |      |        | 12.2                  |
|                | 25–49     | 212       | 1824        |                |  |      |        | 11.6                  |
|                | 15–49     | 382       | 3224        |                |  |      |        | 11.9                  |
| Kenya 2003 DHS | 15–19     | 30        | 856         | 1.4            |  | 2003 | DHS    | 3.6                   |
|                | 20–24     | 24        | 681         |                |  |      |        | 3.5                   |
|                | 15–24     | 54        | 1537        |                |  |      |        | 3.5                   |

| Region            | Age group | Numerator | Denominator | 15–24: 25–49   |  | Year | Source | Prevalence            |
|-------------------|-----------|-----------|-------------|----------------|--|------|--------|-----------------------|
|                   |           |           |             | year old ratio |  |      |        | (%) of clients of FSW |
|                   | 25–49     | 45        | 1825        |                |  |      |        | 2.5                   |
|                   | 15–49     | 99        | 3363        |                |  |      |        | 2.9                   |
| Rwanda 2000 DHS   | 15–19     | 2         | 762         | 1              |  | 2000 | DHS    | 0.3                   |
|                   | 20–24     | 7         | 433         |                |  |      |        | 1.7                   |
|                   | 15–24     | 9         | 1195        |                |  |      |        | 0.8                   |
|                   | 25–49     | 11        | 1337        |                |  |      |        | 0.8                   |
|                   | 15–49     | 20        | 2532        |                |  |      |        | 0.8                   |
| Tanzania 1990 GPA | 1         | 13        | 116         | 2.22           |  | 1990 | GPA    | 11.2                  |
|                   | 3         | 18        | 120         |                |  |      |        | 15                    |
|                   | 4         | 31        | 236         |                |  |      |        | 13.1                  |
|                   | 6         | 27        | 454         |                |  |      |        | 5.9                   |
|                   | 7         | 59        | 690         |                |  |      |        | 8.6                   |

| Region            | Age group | Numerator | Denominator | 15–24: 25–49   |  | Year | Source | Prevalence            |
|-------------------|-----------|-----------|-------------|----------------|--|------|--------|-----------------------|
|                   |           |           |             | year old ratio |  |      |        | (%) of clients of FSW |
| Tanzania 2004 DHS | 15–19     | 10        | 1353        | 0.9            |  | 2004 | DHS    | 0.7                   |
|                   | 20–24     | 24        | 1012        |                |  |      |        | 2.4                   |
|                   | 15–24     | 34        | 2365        |                |  |      |        | 1.4                   |
|                   | 25–49     | 51        | 3294        |                |  |      |        | 1.5                   |
|                   | 15–49     | 84        | 5659        |                |  |      |        | 1.5                   |
| Uganda 1995 DHS   | 15–19     | 47        | 387         | 0.7            |  | 1995 | DHS    | 12.2                  |
|                   | 20–24     | 109       | 367         |                |  |      |        | 29.6                  |
|                   | 15–24     | 156       | 754         |                |  |      |        | 20.7                  |
|                   | 25–49     | 342       | 1147        |                |  |      |        | 29.8                  |
|                   | 15–49     | 498       | 1901        |                |  |      |        | 26.2                  |
| Uganda 2000 DHS   | 15–19     | 2         | 441         | 1              |  | 2000 | DHS    | 0.5                   |
|                   | 20–24     | 9         | 321         |                |  |      |        | 2.9                   |

| Region           | Age group | Numerator | Denominator | 15–24: 25–49   |  | Year | Source | Prevalence            |
|------------------|-----------|-----------|-------------|----------------|--|------|--------|-----------------------|
|                  |           |           |             | year old ratio |  |      |        | (%) of clients of FSW |
|                  | 15–24     | 11        | 762         |                |  |      |        | 1.5                   |
|                  | 25–49     | 17        | 1117        |                |  |      |        | 1.5                   |
|                  | 15–49     | 29        | 1879        |                |  |      |        | 1.5                   |
| <i>S Africa</i>  |           |           |             |                |  |      |        |                       |
| Botswana 2001    | 7         | 39.260002 | 1963        | .              |  | 2001 | AIDS   | 2                     |
| AIDS impact      |           |           |             |                |  |      | impact |                       |
| Lesotho 1989 GPA | 1         | 3         | 90          | 0.300000       |  | 1989 | GPA    | 3.3                   |
|                  | 3         | 8         | 92          |                |  |      |        | 8.7                   |
|                  | 4         | 11        | 182         |                |  |      |        | 6                     |
|                  | 6         | 63        | 314         |                |  |      |        | 20.1                  |
|                  | 7         | 74        | 496         |                |  |      |        | 14.9                  |
| Lesotho 2004 DHS | 7         | .         | .           | .              |  | 2004 | DHS    | 1.7                   |

| Region          | Age group | Numerator | Denominator | 15–24: 25–49   |  | Year | Source | Prevalence            |
|-----------------|-----------|-----------|-------------|----------------|--|------|--------|-----------------------|
|                 |           |           |             | year old ratio |  |      |        | (%) of clients of FSW |
| Malawi 1996 DHS | 15–19     | 41        | 573         | 1.8            |  | 1996 | DHS    | 7.1                   |
|                 | 20–24     | 71        | 491         |                |  |      |        | 14.4                  |
|                 | 15–24     | 112       | 1064        |                |  |      |        | 10.4                  |
|                 | 25–49     | 84        | 1434        |                |  |      |        | 5.9                   |
|                 | 15–49     | 195       | 2498        |                |  |      |        | 7.8                   |
| Malawi 2000 DHS | 15–19     | 78        | 660         | 2              |  | 2000 | DHS    | 11.8                  |
|                 | 20–24     | 68        | 598         |                |  |      |        | 11.4                  |
|                 | 15–24     | 146       | 1258        |                |  |      |        | 11.6                  |
|                 | 25–49     | 94        | 1656        |                |  |      |        | 5.7                   |
|                 | 15–49     | 241       | 2915        |                |  |      |        | 8.3                   |
| Mozambique 2003 | 15–19     | 108       | 673         | 1.3            |  | 2003 | DHS    | 16                    |
| DHS             |           |           |             |                |  |      |        |                       |



| Region           | Age group | Numerator | Denominator | 15–24: 25–49   |  | Year | Source | Prevalence            |
|------------------|-----------|-----------|-------------|----------------|--|------|--------|-----------------------|
|                  |           |           |             | year old ratio |  |      |        | (%) of clients of FSW |
|                  | 20–24     | 60        | 404         |                |  |      |        | 14.8                  |
|                  | 15–24     | 168       | 1077        |                |  |      |        | 15.5                  |
|                  | 25–49     | 162       | 1413        |                |  |      |        | 11.5                  |
|                  | 15–49     | 329       | 2490        |                |  |      |        | 13.2                  |
| Namibia 2000 DHS | 15–19     | 13        | 694         | 1.3            |  | 2000 | DHS    | 1.8                   |
|                  | 20–24     | 10        | 610         |                |  |      |        | 1.7                   |
|                  | 15–24     | 23        | 1304        |                |  |      |        | 1.8                   |
|                  | 25–49     | 20        | 1462        |                |  |      |        | 1.4                   |
|                  | 15–49     | 43        | 2766        |                |  |      |        | 1.6                   |
| Zambia 1996 DHS  | 15–19     | 118       | 460         | 1.5            |  | 1996 | DHS    | 25.7                  |
|                  | 20–24     | 118       | 404         |                |  |      |        | 29.2                  |
|                  | 15–24     | 236       | 864         |                |  |      |        | 27.4                  |

| Region               | Age group | Numerator | Denominator | 15–24: 25–49   |  | Year | Source | Prevalence            |
|----------------------|-----------|-----------|-------------|----------------|--|------|--------|-----------------------|
|                      |           |           |             | year old ratio |  |      |        | (%) of clients of FSW |
|                      | 25–49     | 159       | 868         |                |  |      |        | 18.4                  |
|                      | 15–49     | 396       | 1731        |                |  |      |        | 22.9                  |
| Zambia 2002 DHS      | 15–19     | 50        | 459         | 1.6            |  | 2002 | DHS    | 10.9                  |
|                      | 20–24     | 59        | 346         |                |  |      |        | 17.1                  |
|                      | 15–24     | 109       | 805         |                |  |      |        | 13.6                  |
|                      | 25–49     | 101       | 1170        |                |  |      |        | 8.6                   |
|                      | 15–49     | 210       | 1974        |                |  |      |        | 10.6                  |
| Zimbabwe 1994<br>DHS | 15–19     | 15        | 604         | 0.7            |  | 1994 | DHS    | 2.5                   |
|                      | 20–24     | 28        | 399         |                |  |      |        | 7                     |
|                      | 15–24     | 43        | 1003        |                |  |      |        | 4.3                   |
|                      | 25–49     | 67        | 1024        |                |  |      |        | 6.6                   |

| Region                 | Age group | Numerator | Denominator | 15–24: 25–49   |  | Year | Source | Prevalence            |
|------------------------|-----------|-----------|-------------|----------------|--|------|--------|-----------------------|
|                        |           |           |             | year old ratio |  |      |        | (%) of clients of FSW |
|                        | 15–49     | 110       | 2028        |                |  |      |        | 5.4                   |
| Zimbabwe 1999          | 15–19     | 17        | 713         | 0.7            |  | 1999 | DHS    | 2.4                   |
|                        | 20–24     | 54        | 506         |                |  |      |        | 10.7                  |
|                        | 15–24     | 71        | 1219        |                |  |      |        | 5.9                   |
|                        | 25–49     | 104       | 1286        |                |  |      |        | 8.1                   |
|                        | 15–49     | 176       | 2505        |                |  |      |        | 7                     |
| <i>S &amp; SE Asia</i> |           |           |             |                |  |      |        |                       |
| Nepal 2002 DHS         | 15–19     | 1         | 70          | 7              |  | 2002 | DHS    | 1.4                   |
|                        | 20–24     | 4         | 295         |                |  |      |        | 1.4                   |
|                        | 15–24     | 5         | 365         |                |  |      |        | 1.4                   |
|                        | 25–49     | 3         | 1509        |                |  |      |        | 0.2                   |

| Region           | Age group | Numerator | Denominator | 15–24: 25–49   |  | Year | Source | Prevalence            |
|------------------|-----------|-----------|-------------|----------------|--|------|--------|-----------------------|
|                  |           |           |             | year old ratio |  |      |        | (%) of clients of FSW |
|                  | 15–49     | 8         | 1873        |                |  |      |        | 0.4                   |
| Philippines 2003 | 15–19     | 7         | 918         | 1.1            |  | 2003 | DHS    | 0.7                   |
|                  |           |           |             |                |  |      |        |                       |
|                  | 20–24     | 30        | 785         |                |  |      |        | 3.8                   |
|                  | 15–24     | 37        | 1703        |                |  |      |        | 2.1                   |
|                  | 25–49     | 55        | 2726        |                |  |      |        | 2                     |
|                  | 15–49     | 91        | 4428        |                |  |      |        | 2.1                   |
| Singapore 1989   | 1         | 4         | 156         | 0.44           |  | 1989 | GPA    | 2.6                   |
|                  |           |           |             |                |  |      |        |                       |
|                  | 3         | 10        | 183         |                |  |      |        | 5.5                   |
|                  | 4         | 14        | 339         |                |  |      |        | 4.1                   |
|                  | 6         | 62        | 667         |                |  |      |        | 9.3                   |

| Region            | Age group | Numerator | Denominator | 15–24: 25–49   |  | Year | Source | Prevalence               |
|-------------------|-----------|-----------|-------------|----------------|--|------|--------|--------------------------|
|                   |           |           |             | year old ratio |  |      |        | (%) of clients<br>of FSW |
|                   | 7         | 76        | 1006        |                |  |      |        | 7.6                      |
| Sri Lanka 1991    | 1         | 2         | 265         | 0.44           |  | 1991 | GPA    | 0.8                      |
| GPA               |           |           |             |                |  |      |        |                          |
|                   | 3         | 1         | 246         |                |  |      |        | 0.4                      |
|                   | 4         | 3         | 511         |                |  |      |        | 0.6                      |
|                   | 6         | 15        | 997         |                |  |      |        | 1.5                      |
|                   | 7         | 18        | 1508        |                |  |      |        | 1.2                      |
| Thailand 1990 GPA | 1         | 42        | 172         | 1.690000       |  | 1990 | GPA    | 24.4                     |
|                   | 3         | 69        | 168         |                |  |      |        | 41.1                     |
|                   | 4         | 111       | 340         |                |  |      |        | 32.6                     |
|                   | 6         | 152       | 786         |                |  |      |        | 19.3                     |
|                   | 7         | 263       | 1126        |                |  |      |        | 23.4                     |

| Region                               | Age group | Numerator | Denominator | 15–24: 25–49   |  | Year | Source | Prevalence            |
|--------------------------------------|-----------|-----------|-------------|----------------|--|------|--------|-----------------------|
|                                      |           |           |             | year old ratio |  |      |        | (%) of clients of FSW |
| <i>Latin America &amp; Caribbean</i> |           |           |             |                |  |      |        |                       |
| Bolivia 2003 DHS                     | 15–19     | 12        | 1199        | 1              |  | 2003 | DHS    | 1                     |
|                                      | 20–24     | 41        | 961         |                |  |      |        | 4.3                   |
|                                      | 15–24     | 53        | 2160        |                |  |      |        | 2.4                   |
|                                      | 25–49     | 80        | 3167        |                |  |      |        | 2.5                   |
|                                      | 15–49     | 133       | 5327        |                |  |      |        | 2.5                   |
| Brazil 1996 DHS                      | 15–19     | 1         | 575         | 3              |  | 1996 | DHS    | 0.1                   |
|                                      | 20–24     | 3         | 470         |                |  |      |        | 0.6                   |
|                                      | 15–24     | 4         | 1045        |                |  |      |        | 0.3                   |
|                                      | 25–49     | 1         | 1545        |                |  |      |        | 0.1                   |
|                                      | 15–49     | 4         | 2590        |                |  |      |        | 0.2                   |

| Region             | Age group | Numerator | Denominator | 15–24: 25–49   |  | Year | Source | Prevalence            |
|--------------------|-----------|-----------|-------------|----------------|--|------|--------|-----------------------|
|                    |           |           |             | year old ratio |  |      |        | (%) of clients of FSW |
| Chile 1998 NAT     | .         | 20        | 2035        | 1.690000       |  | 1998 | NAT    | 1                     |
| Dominican Republic | 15–19     | 41        | 455         | 1.1            |  | 1996 | DHS    | 9.1                   |
|                    | 1996 DHS  |           |             |                |  |      |        |                       |
|                    | 20–24     | 59        | 381         |                |  |      |        | 15.6                  |
|                    | 15–24     | 100       | 836         |                |  |      |        | 12.1                  |
|                    | 25–49     | 125       | 1115        |                |  |      |        | 11.2                  |
|                    | 15–49     | 225       | 1951        |                |  |      |        | 11.6                  |
| Dominican Republic | 15–19     | 26        | 555         | 0.8            |  | 2002 | DHS    | 4.6                   |
|                    | 2002 DHS  |           |             |                |  |      |        |                       |
|                    | 20–24     | 44        | 466         |                |  |      |        | 9.5                   |
|                    | 15–24     | 70        | 1021        |                |  |      |        | 6.9                   |
|                    | 25–49     | 132       | 1517        |                |  |      |        | 8.7                   |

| Region            | Age group | Numerator | Denominator | 15–24: 25–49   |  | Year | Source | Prevalence            |
|-------------------|-----------|-----------|-------------|----------------|--|------|--------|-----------------------|
|                   |           |           |             | year old ratio |  |      |        | (%) of clients of FSW |
|                   | 15–49     | 202       | 2537        |                |  |      |        | 8                     |
| Haiti 1994 DHS    | 15–19     | 13        | 350         | 0.8            |  | 1994 | DHS    | 4                     |
|                   | 20–24     | 23        | 295         |                |  |      |        | 8.2                   |
|                   | 15–24     | 36        | 645         |                |  |      |        | 5.9                   |
|                   | 25–49     | 58        | 820         |                |  |      |        | 7.5                   |
|                   | 15–49     | 95        | 1465        |                |  |      |        | 6.8                   |
| Haiti 2000 DHS    | 15–19     | 34        | 768         | 0.6            |  | 2000 | DHS    | 4.4                   |
|                   | 20–24     | 22        | 512         |                |  |      |        | 4.2                   |
|                   | 15–24     | 56        | 1280        |                |  |      |        | 4.3                   |
|                   | 25–49     | 110       | 1528        |                |  |      |        | 7.2                   |
|                   | 15–49     | 165       | 2809        |                |  |      |        | 5.9                   |
| Honduras 1996 RHS | 1         | 63        | 1157        | 1.86           |  | 1996 | RHS    | 5.4                   |



| Region                        | Age group | Numerator | Denominator | 15–24: 25–49   |  | Year | Source | Prevalence            |
|-------------------------------|-----------|-----------|-------------|----------------|--|------|--------|-----------------------|
|                               |           |           |             | year old ratio |  |      |        | (%) of clients of FSW |
|                               | 3         | 56        | 681         |                |  |      |        | 8.2                   |
|                               | 4         | 119       | 1838        |                |  |      |        | 6.5                   |
|                               | 6         | 74        | 2120        |                |  |      |        | 3.5                   |
|                               | 7         | 193       | 3958        |                |  |      |        | 4.9                   |
| Peru 1996 DHS                 | 15–19     | 18        | 453         | 1.3            |  | 1996 | DHS    | 4                     |
|                               | 20–24     | 26        | 375         |                |  |      |        | 7                     |
|                               | 15–24     | 44        | 828         |                |  |      |        | 5.3                   |
|                               | 25–49     | 59        | 1414        |                |  |      |        | 4.2                   |
|                               | 15–49     | 103       | 2241        |                |  |      |        | 4.6                   |
| <i>E Europe &amp; Central</i> |           |           |             |                |  |      |        |                       |
| <i>Asia</i>                   |           |           |             |                |  |      |        |                       |
| Armenia 2000 DHS              | 15–19     | 10        | 263         | 2.4            |  | 2000 | DHS    | 3.9                   |



| Region             | Age group | Numerator | Denominator | 15–24: 25–49   |  | Year | Source | Prevalence               |
|--------------------|-----------|-----------|-------------|----------------|--|------|--------|--------------------------|
|                    |           |           |             | year old ratio |  |      |        | (%) of clients<br>of FSW |
| <i>High income</i> |           |           |             |                |  |      |        |                          |
| <i>countries</i>   |           |           |             |                |  |      |        |                          |
| Australia 2002     | 15–19     | 5         | 704         | 0.9            |  | 2002 | ASHR   | 0.7                      |
|                    | 20–24     | 26        | 1131        |                |  |      |        | 2.3                      |
|                    | 15–24     | 31        | 1835        |                |  |      |        | 1.7                      |
|                    | 25–49     | 109       | 5840        |                |  |      |        | 1.9                      |
|                    | 15–49     | 140       | 7675        |                |  |      |        | 1.8                      |
| France 1992 NAT    | 2         | 1         | 130         | 2              |  | 1992 | NAT    | 0.8                      |
|                    | 3         | 11        | 487         |                |  |      |        | 2.3                      |
|                    | 5         | 12        | 617         |                |  |      |        | 1.9                      |
|                    | 6         | 12        | 1559        |                |  |      |        | 0.8                      |

| Region           | Age group | Numerator | Denominator | 15–24: 25–49   |  | Year | Source | Prevalence            |
|------------------|-----------|-----------|-------------|----------------|--|------|--------|-----------------------|
|                  |           |           |             | year old ratio |  |      |        | (%) of clients of FSW |
|                  | 9         | 24        | 2176        |                |  |      |        | 1.1                   |
| France 1998 NEM  | 15–19     | 0         | 38          | 0.1            |  | 1998 | NEM    | 0                     |
|                  | 20–24     | 0         | 67          |                |  |      |        | 0.2                   |
|                  | 15–24     | 0         | 105         |                |  |      |        | 0.1                   |
|                  | 25–49     | 4         | 435         |                |  |      |        | 0.8                   |
|                  | 15–49     | 4         | 539         |                |  |      |        | 0.7                   |
| Germany 1990 NAT | 2         | 1         | 43          | 1.53           |  | 1990 | NAT    | 2.3                   |
|                  | 3         | 14        | 186         |                |  |      |        | 7.5                   |
|                  | 5         | 15        | 229         |                |  |      |        | 6.6                   |
|                  | 6         | 33        | 761         |                |  |      |        | 4.3                   |
|                  | 9         | 48        | 990         |                |  |      |        | 4.8                   |
| Germany 1998     | 15–19     | 0         | 52          | .              |  | 1998 | NEM    | 0                     |

| Region          | Age group | Numerator | Denominator | 15–24: 25–49   |                       | Year | Source | Prevalence |
|-----------------|-----------|-----------|-------------|----------------|-----------------------|------|--------|------------|
|                 |           |           |             | year old ratio | (%) of clients of FSW |      |        |            |
| NEM             |           |           |             |                |                       |      |        |            |
|                 | 20–24     | 0         | 120         |                |                       |      |        | 0          |
|                 | 15–24     | 0         | 172         |                |                       |      |        | 0          |
|                 | 25–49     | 0         | 853         |                |                       |      |        | 0          |
|                 | 15–49     | 0         | 1025        |                |                       |      |        | 0          |
| Greece 1998 NEM | 15–19     | 5         | 65          | 1.3            | 1998                  | NEM  |        | 7          |
|                 | 20–24     | 10        | 166         |                |                       |      |        | 6          |
|                 | 15–24     | 15        | 231         |                |                       |      |        | 6.3        |
|                 | 25–49     | 38        | 774         |                |                       |      |        | 5          |
|                 | 15–49     | 53        | 1005        |                |                       |      |        | 5.3        |
| Italy 1992 NAT  | 1         | 1         | 37          | 1.309999       | 1992                  | NAT  |        | 2.7        |
|                 | 3         | 4         | 160         |                |                       |      |        | 2.5        |

| Region           | Age group | Numerator | Denominator | 15–24: 25–49   |                       | Year | Source | Prevalence |
|------------------|-----------|-----------|-------------|----------------|-----------------------|------|--------|------------|
|                  |           |           |             | year old ratio | (%) of clients of FSW |      |        |            |
|                  | 4         | 5         | 197         |                |                       |      |        | 2.5        |
|                  | 6         | 18        | 957         |                |                       |      |        | 1.9        |
|                  | 7         | 23        | 1154        |                |                       |      |        | 2          |
| Italy 1998 NEM   | 15–19     | 1         | 69          | 1.1            |                       | 1998 | NEM    | 1.1        |
|                  | 20–24     | 4         | 205         |                |                       |      |        | 2.1        |
|                  | 15–24     | 5         | 274         |                |                       |      |        | 1.9        |
|                  | 25–49     | 18        | 1036        |                |                       |      |        | 1.7        |
|                  | 15–49     | 23        | 1311        |                |                       |      |        | 1.7        |
| Netherlands 1989 | 2         | 0         | 14          | 0.41           |                       | 1989 | NAT    | 0          |
| NAT              | 3         | 1         | 64          |                |                       |      |        | 1.6        |
|                  | 5         | 1         | 78          |                |                       |      |        | 1.3        |

| Region          | Age group | Numerator | Denominator | 15–24: 25–49   |                       | Year | Source | Prevalence |
|-----------------|-----------|-----------|-------------|----------------|-----------------------|------|--------|------------|
|                 |           |           |             | year old ratio | (%) of clients of FSW |      |        |            |
|                 | 6         | 9         | 285         |                |                       |      |        | 3.2        |
|                 | 9         | 10        | 363         |                |                       |      |        | 2.8        |
| Norway 1992 NAT | 2         | 1         | 73          | 0.829999       | 1992                  | NAT  |        | 1.4        |
|                 | 3         | 4         | 251         |                |                       |      |        | 1.6        |
|                 | 5         | 5         | 324         |                |                       |      |        | 1.5        |
|                 | 6         | 22        | 1199        |                |                       |      |        | 1.8        |
|                 | 9         | 27        | 1523        |                |                       |      |        | 1.8        |
| Norway 1997 NEM | 15–19     | 0         | 101         | 0.1            | 1997                  | NEM  |        | 0          |
|                 | 20–24     | 1         | 282         |                |                       |      |        | 0.4        |
|                 | 15–24     | 1         | 383         |                |                       |      |        | 0.3        |
|                 | 25–49     | 31        | 1505        |                |                       |      |        | 2.1        |
|                 | 15–49     | 32        | 1889        |                |                       |      |        | 1.7        |

| Region            | Age group | Numerator | Denominator | 15–24: 25–49   |      | Prevalence |                       |
|-------------------|-----------|-----------|-------------|----------------|------|------------|-----------------------|
|                   |           |           |             | year old ratio | Year | Source     | (%) of clients of FSW |
| Portugal 1991 NAT | 2         | 0         | 68          | 0.660000       | 1991 | NAT        | 0                     |
|                   | 3         | 9         | 163         |                |      |            | 5.5                   |
|                   | 5         | 9         | 231         |                |      |            | 3.9                   |
|                   | 6         | 45        | 762         |                |      |            | 5.9                   |
|                   | 9         | 54        | 993         |                |      |            | 5.4                   |
| Portugal 1999 NEM | 15–19     | 0         | 22          | 1.1            | 1999 | NEM        | 0                     |
|                   | 20–24     | 2         | 60          |                |      |            | 3.5                   |
|                   | 15–24     | 2         | 82          |                |      |            | 2.6                   |
|                   | 25–49     | 6         | 256         |                |      |            | 2.4                   |
|                   | 15–49     | 8         | 338         |                |      |            | 2.4                   |
| Spain 1990 NAT    | 2         | 6         | 53          | 0.949999       | 1990 | NAT        | 11.3                  |
|                   | 3         | 16        | 152         |                |      |            | 10.5                  |



| Region           | Age group | Numerator | Denominator | 15–24: 25–49   |                       | Year | Source | Prevalence |
|------------------|-----------|-----------|-------------|----------------|-----------------------|------|--------|------------|
|                  |           |           |             | year old ratio | (%) of clients of FSW |      |        |            |
|                  | 5         | 22        | 205         |                |                       |      |        | 10.7       |
|                  | 6         | 23        | 204         |                |                       |      |        | 11.3       |
|                  | 9         | 45        | 409         |                |                       |      |        | 11         |
| Switzerland 1992 | 2         | 3         | 48          | 1.309999       | 1992                  | NAT  |        | 6.3        |
| NAT              |           |           |             |                |                       |      |        |            |
|                  | 3         | 8         | 193         |                |                       |      |        | 4.1        |
|                  | 5         | 11        | 241         |                |                       |      |        | 4.6        |
|                  | 10        | 47        | 1262        |                |                       |      |        | 3.7        |
|                  | .         | 36        | 1021        |                |                       |      |        | 3.5        |
| Switzerland 1997 | 15–19     | 3         | 87          | 1.1            | 1997                  | NEM  |        | 4          |
| NEM              |           |           |             |                |                       |      |        |            |
|                  | 20–24     | 8         | 243         |                |                       |      |        | 3.3        |

| Region      | Age group | Numerator | Denominator | 15–24: 25–49   |  | Year | Source | Prevalence            |
|-------------|-----------|-----------|-------------|----------------|--|------|--------|-----------------------|
|             |           |           |             | year old ratio |  |      |        | (%) of clients of FSW |
|             | 15–24     | 11        | 330         |                |  |      |        | 3.5                   |
|             | 25–49     | 36        | 1079        |                |  |      |        | 3.3                   |
|             | 15–49     | 47        | 1408        |                |  |      |        | 3.4                   |
| UK 1990 NAT | 1         | 3         | 874         | 0.759999       |  | 1990 | NAT    | 0.3                   |
|             | 3         | 32        | 1279        |                |  |      |        | 2.5                   |
|             | 4         | 35        | 2153        |                |  |      |        | 1.6                   |
|             | 6         | 103       | 4799        |                |  |      |        | 2.1                   |
|             | 7         | 138       | 6952        |                |  |      |        | 2                     |
| UK 1998 NEM | 15–19     | 0         | 93          | 0.9            |  | 1998 | NEM    | 0                     |
|             | 20–24     | 2         | 169         |                |  |      |        | 1.4                   |
|             | 15–24     | 2         | 262         |                |  |      |        | 0.9                   |
|             | 25–49     | 12        | 1225        |                |  |      |        | 1                     |

| Region                    | Age group | Numerator | Denominator | 15–24: 25–49   |      | Year | Source    | Prevalence            |
|---------------------------|-----------|-----------|-------------|----------------|------|------|-----------|-----------------------|
|                           |           |           |             | year old ratio |      |      |           | (%) of clients of FSW |
|                           | 15–49     | 14        | 1487        |                |      |      |           | 1                     |
| <i>City based surveys</i> |           |           |             |                |      |      |           |                       |
| Athens, Greece            | 15–19     | 4         | 45          | 1.23           |      |      | NEM       | 8.9%                  |
|                           | 20–24     | 10        | 155         |                |      |      |           | 6.5%                  |
|                           | 15–24     | 14        | 200         |                |      |      |           | 7.0%                  |
|                           | 25–49     | 40        | 699         |                |      |      |           | 5.7%                  |
|                           | 15–49     | 54        | 899         |                |      |      |           | 6.0%                  |
| Cotonou*, Benin           | 15–19     | 4         | 195         | 1.07           | 1998 |      | Multisite | 2.1%                  |
|                           | 20–24     | 21        | 233         |                |      |      |           | 9.0%                  |
|                           | 15–24     | 25        | 428         |                |      |      |           | 6.2%                  |
|                           | 25–49     | 42        | 597         |                |      |      |           | 5.8%                  |
|                           | 15–49     | 67        | 1025        |                |      |      |           | 6.5%                  |

| Region          | Age group | Numerator | Denominator | 15–24: 25–49   |                       | Year      | Source | Prevalence |
|-----------------|-----------|-----------|-------------|----------------|-----------------------|-----------|--------|------------|
|                 |           |           |             | year old ratio | (%) of clients of FSW |           |        |            |
| Dakar*, Senegal | 15–24     | 7         | 142         | 1.14           | 1997                  | Multisite | 4.9%   |            |
|                 | 25–49     | 21        | 487         |                |                       |           | 4.3%   |            |
|                 | 15–49     | 28        | 629         |                |                       |           | 4.5%   |            |
| Kisumu*, Kenya  | 15–19     | 18        | 194         | 1.72           | 1998                  | Multisite | 9.3%   |            |
|                 | 20–24     | 25        | 191         |                |                       |           | 13.1%  |            |
|                 | 15–24     | 43        | 385         |                |                       |           | 11.2%  |            |
|                 | 25–49     | 29        | 444         |                |                       |           | 6.5%   |            |
|                 | 15–49     | 72        | 829         |                |                       |           | 8.7%   |            |
| Ndola*, Zambia  | 15–19     | 18        | 125         | 1.53           | 1998                  | Multisite | 14.4%  |            |
|                 | 20–24     | 32        | 156         |                |                       |           | 20.5%  |            |
|                 | 15–24     | 50        | 281         |                |                       |           | 17.8%  |            |
|                 | 25–49     | 51        | 439         |                |                       |           | 11.6%  |            |

| Region                   | Age group | Numerator | Denominator | 15–24: 25–49   |      | Prevalence |                       |
|--------------------------|-----------|-----------|-------------|----------------|------|------------|-----------------------|
|                          |           |           |             | year old ratio | Year | Source     | (%) of clients of FSW |
|                          | 15–49     | 101       | 720         |                |      |            | 14.0%                 |
| Yaounde*,<br>Cameroon    | 15–19     | 14        | 207         | 0.66           | 1998 | Multisite  | 6.8%                  |
|                          | 20–24     | 37        | 222         |                |      |            | 16.7%                 |
|                          | 15–24     | 51        | 429         |                |      |            | 11.9%                 |
|                          | 25–49     | 99        | 553         |                |      |            | 17.9%                 |
|                          | 15–49     | 152       | 982         |                |      |            | 15.5%                 |
| Ouagadougou*,<br>Burkina | 15–19     | 72        | 590         |                | 2002 | Multisite  | 12.2%                 |
| Manila, Philippines      | 15–19     | 4         | 137         | 1.31           | 1990 | GPA        | 3.0%                  |
|                          | 20–24     | 13        | 115         |                |      |            | 11.5%                 |
|                          | 15–24     | 17        | 252         |                |      |            | 6.7%                  |

| Region          | Age group | Numerator | Denominator | 15–24: 25–49   |      | Year | Source | Prevalence            |
|-----------------|-----------|-----------|-------------|----------------|------|------|--------|-----------------------|
|                 |           |           |             | year old ratio |      |      |        | (%) of clients of FSW |
|                 | 25–49     | 17        | 330         |                |      |      |        | 5.1%                  |
|                 | 15–49     | 34        | 582         |                |      |      |        | 5.8%                  |
| Rio de Janeiro, |           |           |             |                |      |      |        |                       |
| Brazil          | 15–19     | 6         | 77          | 1.3            | 1991 | GPA  |        | 8.2%                  |
|                 | 20–24     | 7         | 89          |                |      |      |        | 8.3%                  |
|                 | 15–24     | 13        | 166         |                |      |      |        | 7.8%                  |
|                 | 25–49     | 27        | 452         |                |      |      |        | 6.0%                  |
|                 | 15–49     | 40        | 618         |                |      |      |        | 6.5%                  |

†Defined as all men 15–49 years old who reported giving money, gifts or favors in return for sex, in the last 12 months, except countries with \* where definition is “paid sex”.

(1) Sample only includes respondents with a non-regular partner.

(2) Sample only includes ever married men.

(3) Of last three partners, at least one was a sex worker.

(4) Sample includes sexually active only.
